# Supplementary material
Source: ML conference proceedings conference paper supplement (https://openreview.net/forum?id=2jMxi682Wt)
Supplement: supplementary_material [file attachment]

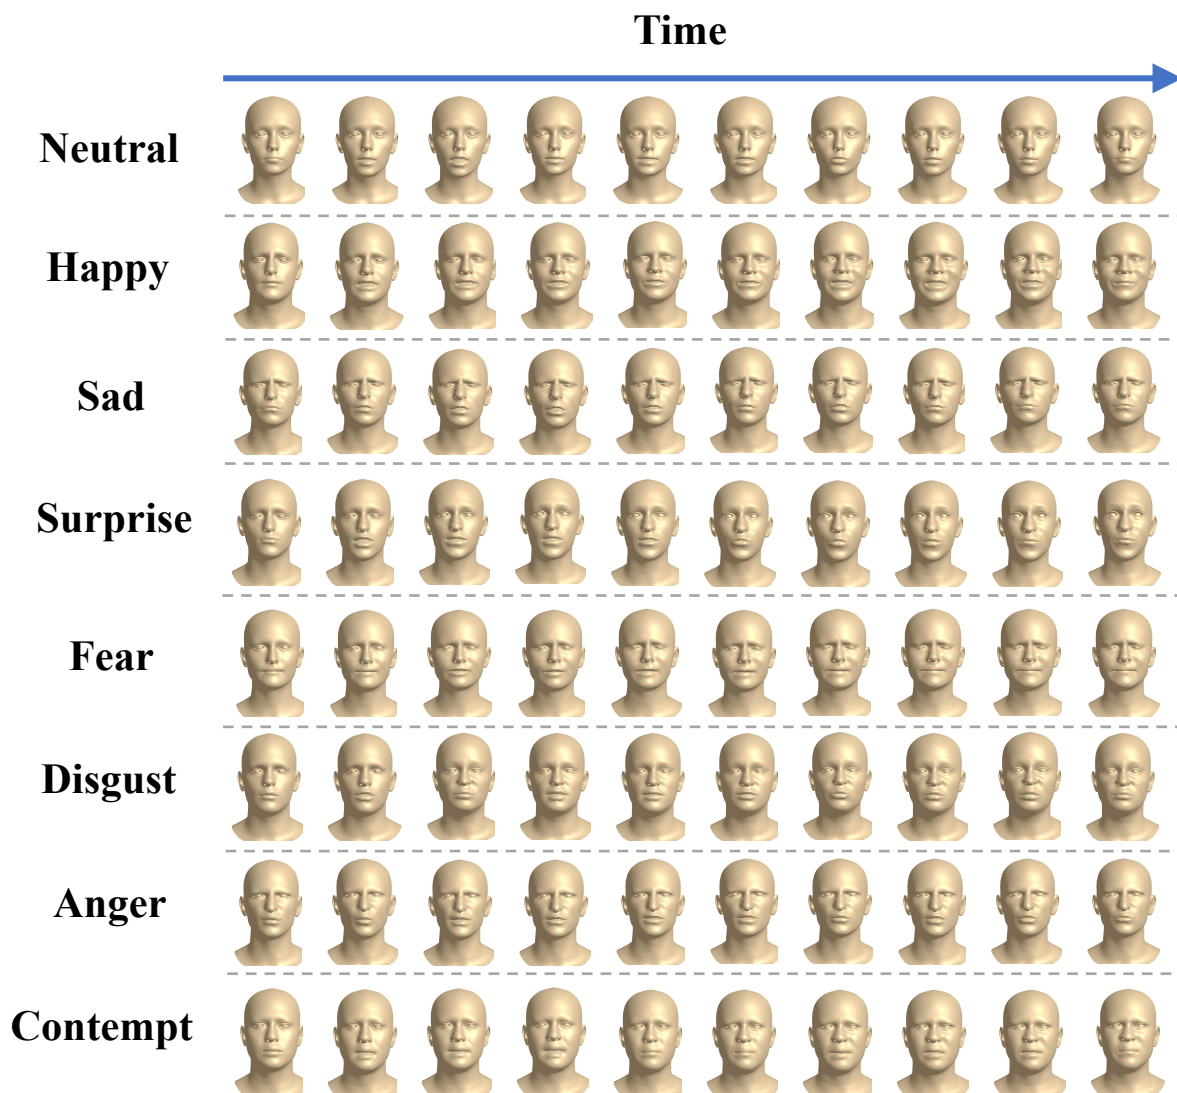

**Fig.1: Our framework produces emotional facial animations with diverse identities, effectively conveying emotional expressions.**

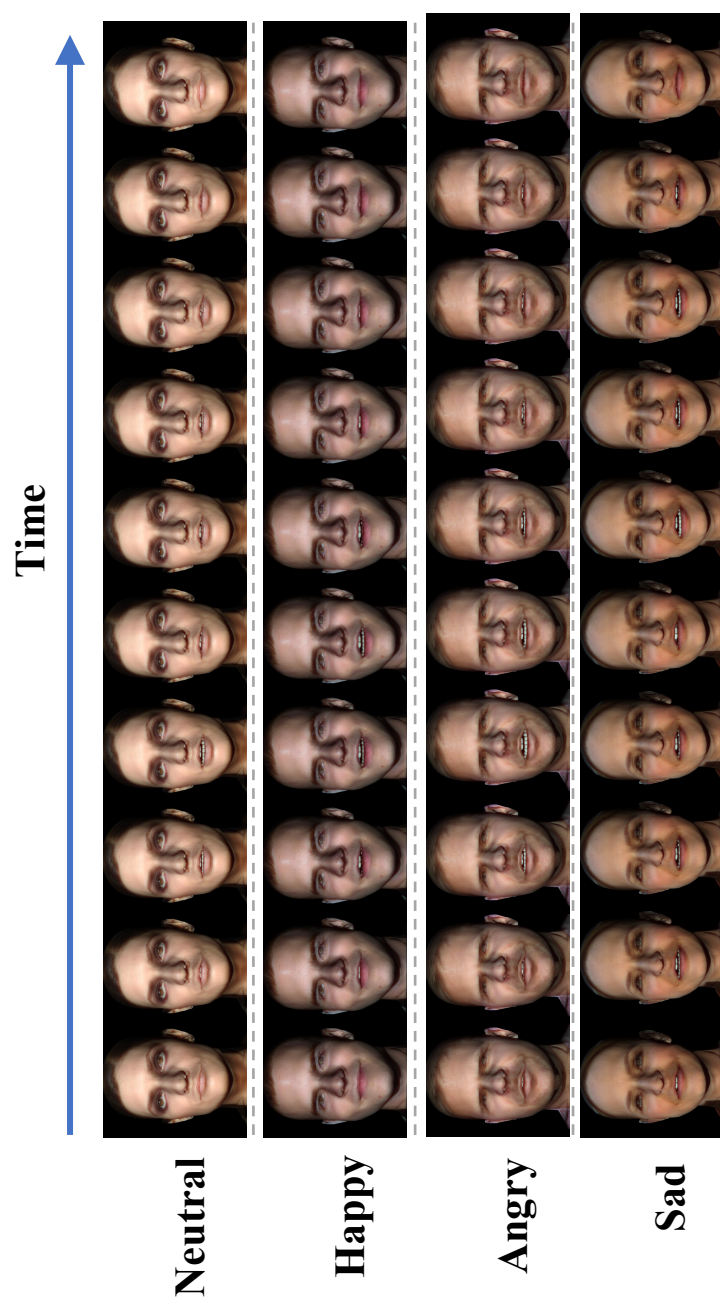

**Fig.2: Results of the facial animation sequences generated by our developed skin-realistic renderer.**

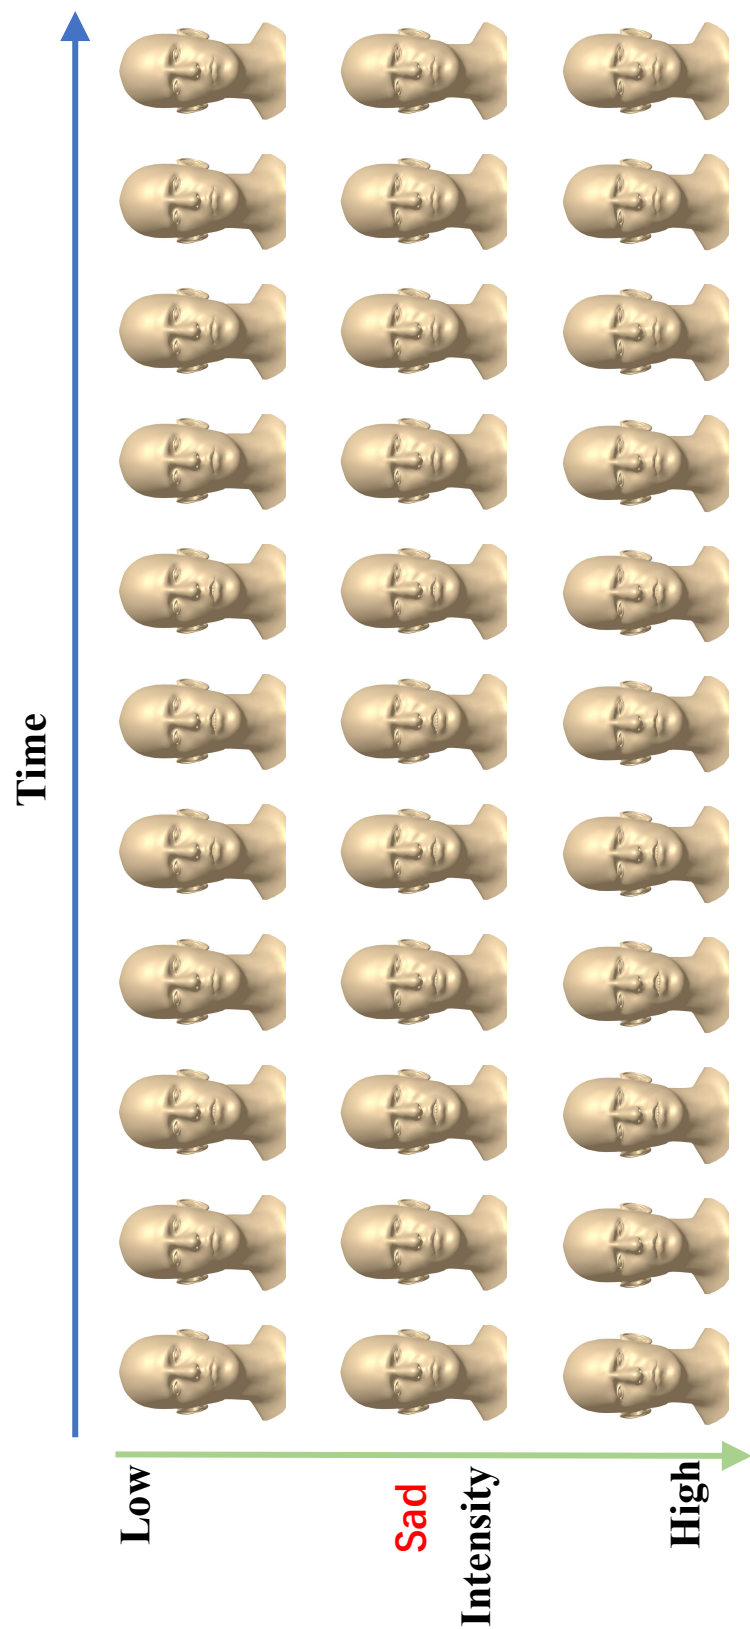

**Fig.3: Additional results with the same identity and emotion category (sad) but different emotion intensities.**
